# Supplementary material for: Sex Differences in the Effects of a Kappa Opioid Receptor Antagonist in the Forced Swim Test
Source: PubMed Central journal article supplement (PMC5817081; doi:10.3389/fphar.2018.00093), 2018-02-14
Supplement: Image_1.pdf [file Image_1.pdf]

**Figure S1:** Pharmacokinetic data for JD<sub>Tic</sub> in male and female C57Bl/6J mice. Plasma (A) and brain (B) concentrations of JD<sub>Tic</sub> at different time points including pharmacokinetic constants (C). \*  $p < 0.05$ , effect of sex.

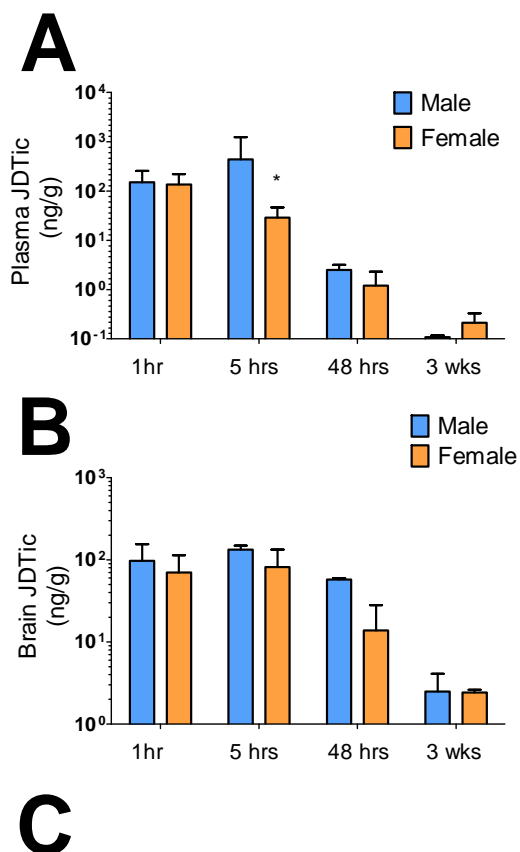

**C**

|                           | Brain   |          | Plasma   |          |
|---------------------------|---------|----------|----------|----------|
|                           | Male    | Female   | Male     | Female   |
| K (1/h)                   | 0.00744 | 0.003808 | 0.006874 | 0.003823 |
| t <sub>1/2</sub> (h)      | 93.2    | 182      | 100.8    | 181.3    |
| C <sub>max</sub> (ng/ml)  | 133.75  | 81.795   | 437.95   | 135.7    |
| C <sub>last</sub> (ng/ml) | 2.508   | 2.425    | 0.109    | 0.212    |
| AUC (h*ng/ml)             | 18329   | 6086     | 11315    | 1369     |
